# Supplementary material for: SIRT6 Minor Allele Genotype Is Associated with >5-Year Decrease in Lifespan in an Aged Cohort
Source: PubMed Central journal article supplement (PMC4277407; doi:10.1371/journal.pone.0115616), 2014-12-26
Supplement: pone.0115616.s001.pdf [file pone.0115616.s001.pdf]

Table S1. Genotype frequency, distribution, and genotype-specific mean age at death of the remaining SNPs not associated with longevity

| Gene         | Chromosome | rs#        | Position | Genotype | Genotype frequency | Age at death | q-value | Partial correlation* |
|--------------|------------|------------|----------|----------|--------------------|--------------|---------|----------------------|
| <b>SIRT3</b> | 11p15.5    | rs570591   | 205364   | GG       | 832                | 87.77        | 0.186   | 0.0029               |
|              |            |            |          | GA       | 336                | 87.41        |         |                      |
|              |            |            |          | AA       | 24                 | 85.63        |         |                      |
|              |            |            |          | Missing  | 0                  |              |         |                      |
|              |            | rs12226697 | 206056   | GG       | 1098               | 87.61        | 0.784   | 0.0004               |
|              |            |            |          | GA       | 90                 | 87.54        |         |                      |
|              |            |            |          | AA       | 3                  | 85.16        |         |                      |
|              |            |            |          | Missing  | 1                  |              |         |                      |
|              |            | rs3847648  | 208613   | GG       | 1110               | 87.60        | 0.682   | 0.0007               |
|              |            |            |          | GA       | 79                 | 87.80        |         |                      |
|              |            |            |          | AA       | 2                  | 91.24        |         |                      |
|              |            |            |          | Missing  | 1                  |              |         |                      |
|              |            | rs3782116  | 213119   | AA       | 760                | 87.45        | 0.099   | 0.0004               |
|              |            |            |          | AG       | 383                | 87.56        |         |                      |
| GG           | 48         |            |          | 88.71    |                    |              |         |                      |
| Missing      | 1          |            |          |          |                    |              |         |                      |
| rs1023430    | 214393     | AA         | 760      | 87.78    | 0.105              | 0.0038       |         |                      |
|              |            | AG         | 383      | 87.59    |                    |              |         |                      |
|              |            | GG         | 48       | 85.85    |                    |              |         |                      |
|              |            | Missing    | 1        |          |                    |              |         |                      |
| rs536715     | 220368     | GG         | 949      | 87.57    | 0.799              | 0.0004       |         |                      |
|              |            | GA         | 227      | 87.81    |                    |              |         |                      |
|              |            | AA         | 15       | 86.98    |                    |              |         |                      |
|              |            | Missing    | 1        |          |                    |              |         |                      |
| rs11246020   | 223067     | GG         | 768      | 87.62    | 0.051              | 0.0051       |         |                      |
|              |            | GA         | 382      | 87.43    |                    |              |         |                      |
|              |            | AA         | 40       | 89.92    |                    |              |         |                      |
|              |            | Missing    | 2        |          |                    |              |         |                      |
| rs28365927   | 226091     | GG         | 833      | 87.52    | 0.13               | 0.0037       |         |                      |
|              |            | GA         | 282      | 86.75    |                    |              |         |                      |
|              |            | AA         | 20       | 86.12    |                    |              |         |                      |
|              |            | Missing    | 57       |          |                    |              |         |                      |
| rs227563     | 226871     | CC         | 629      | 87.43    | 0.246              | 0.0025       |         |                      |
|              |            | CT         | 419      | 87.78    |                    |              |         |                      |
|              |            | TT         | 80       | 88.60    |                    |              |         |                      |
|              |            | Missing    | 64       |          |                    |              |         |                      |
| rs939915     | 227737     | TT         | 688      | 87.86    | 0.109              | 0.0038       |         |                      |
|              |            | AT         | 420      | 87.63    |                    |              |         |                      |
|              |            | AA         | 63       | 86.15    |                    |              |         |                      |
|              |            | Missing    | 21       |          |                    |              |         |                      |
| <b>SIRT5</b> | 6p23       | rs9382222  | 13678265 | CC       | 566                | 87.53        | 0.854   | 0.0003               |
| CT           | 484        | 87.72      |          |          |                    |              |         |                      |
| TT           | 123        | 87.46      |          |          |                    |              |         |                      |
| Missing      | 18         |            |          |          |                    |              |         |                      |
| <b>SOD3</b>  | 4p15.2     | rs8192287  | 24405666 | GG       | 1063               | 87.79        | 0.267   | 0.022                |
|              |            |            |          | GT       | 127                | 86.97        |         |                      |
|              |            |            |          | TT       | 2                  | 84.06        |         |                      |
|              |            |            |          | Missing  | 0                  |              |         |                      |

| Gene      | Chromosome | rs#        | Position  | Genotype | Genotype frequency | Age at death | q-value | Partial correlation* |
|-----------|------------|------------|-----------|----------|--------------------|--------------|---------|----------------------|
| FOXO3     | 6q21       | rs6911407  | 108973724 | CC       | 401                | 87.17        | 0.092   | 0.004                |
|           |            |            |           | CA       | 593                | 87.70        |         |                      |
|           |            |            |           | AA       | 187                | 88.89        |         |                      |
|           |            |            |           | Missing  | 11                 |              |         |                      |
|           |            | rs2802288  | 109002908 | GG       | 422                | 87.33        | 0.151   | 0.0032               |
|           |            |            |           | GA       | 578                | 87.56        |         |                      |
|           |            |            |           | AA       | 190                | 88.37        |         |                      |
|           |            |            |           | Missing  | 2                  |              |         |                      |
|           |            | rs17598747 | 109048086 | AA       | 932                | 87.64        | 0.513   | 0.0012               |
|           |            |            |           | AG       | 230                | 87.48        |         |                      |
|           |            |            |           | GG       | 17                 | 89.26        |         |                      |
|           |            |            |           | Missing  | 13                 |              |         |                      |
| rs9400239 | 109084356  | CC         | 539       | 87.30    | 0.09               | 0.0042       |         |                      |
|           |            | CT         | 511       | 87.55    |                    |              |         |                      |
|           |            | TT         | 119       | 88.68    |                    |              |         |                      |
|           |            | Missing    | 23        |          |                    |              |         |                      |
| SIRT1     | 10q21.3    | rs7895833  | 69293063  | AA       | 896                | 87.79        | 0.23    | 0.0021               |
|           |            |            |           | AG       | 381                | 87.24        |         |                      |
|           |            |            |           | GG       | 59                 | 87.06        |         |                      |
|           |            |            |           | Missing  | 0                  |              |         |                      |
|           |            | rs12778366 | 69313085  | TT       | 896                | 87.70        | 0.731   | 0.0005               |
|           |            |            |           | TC       | 272                | 87.36        |         |                      |
|           |            |            |           | CC       | 17                 | 87.62        |         |                      |
|           |            |            |           | Missing  | 7                  |              |         |                      |
|           |            | rs3758391  | 69313348  | CC       | 527                | 88.07        | 0.072   | 0.0045               |
|           |            |            |           | CT       | 515                | 87.20        |         |                      |
|           |            |            |           | TT       | 145                | 87.44        |         |                      |
|           |            |            |           | Missing  | 5                  |              |         |                      |
|           |            | rs7896005  | 69321131  | GG       | 500                | 87.92        | 0.069   | 0.0046               |
|           |            |            |           | GA       | 534                | 87.04        |         |                      |
|           |            |            |           | AA       | 156                | 87.27        |         |                      |
|           |            |            |           | Missing  | 2                  |              |         |                      |
| rs2273773 | 69336604   | TT         | 1032      | 87.60    | 0.692              | 0.0006       |         |                      |
|           |            | TC         | 151       | 87.91    |                    |              |         |                      |
|           |            | CC         | 6         | 86.06    |                    |              |         |                      |
|           |            | Missing    | 3         |          |                    |              |         |                      |
| rs1467568 | 69345164   | GG         | 501       | 88.10    | 0.068              | 0.0046       |         |                      |
|           |            | GA         | 532       | 87.21    |                    |              |         |                      |
|           |            | AA         | 156       | 87.44    |                    |              |         |                      |
|           |            | Missing    | 3         |          |                    |              |         |                      |
| rs2234975 | 69348084   | CC         | 978       | 87.54    | 0.283              | 0.0022       |         |                      |
|           |            | CT         | 193       | 88.17    |                    |              |         |                      |
|           |            | TT         | 16        | 89.05    |                    |              |         |                      |
|           |            | Missing    | 5         |          |                    |              |         |                      |
| SIRT4     | 12q24.31   | rs2522138  | 119226527 | AA       | 829                | 87.31        | 0.097   | 0.0024               |
|           |            |            |           | AG       | 341                | 87.97        |         |                      |
|           |            |            |           | GG       | 0                  |              |         |                      |
|           |            |            |           | Missing  | 22                 |              |         |                      |

| Gene       | Chromosome | rs#        | Position  | Genotype | Genotype frequency | Age at death | q-value | Partial correlation* |
|------------|------------|------------|-----------|----------|--------------------|--------------|---------|----------------------|
| SIRT2      | 19q13.2    | rs2015     | 44061209  | AA       | 410                | 87.59        | 0.119   | 0.0036               |
|            |            |            |           | AC       | 561                | 87.32        |         |                      |
|            |            |            |           | CC       | 212                | 88.35        |         |                      |
|            |            |            |           | Missing  | 9                  |              |         |                      |
|            |            | rs9941448  | 44070644  | CC       | 1035               | 87.63        | 0.761   | 0.0005               |
|            |            |            |           | CT       | 147                | 87.61        |         |                      |
|            |            |            |           | TT       | 10                 | 86.18        |         |                      |
|            |            |            |           | Missing  | 0                  |              |         |                      |
|            |            | rs10410544 | 44077372  | CC       | 349                | 87.39        | 0.648   | 0.0007               |
|            |            |            |           | CT       | 578                | 87.77        |         |                      |
|            |            |            |           | TT       | 154                | 87.70        |         |                      |
|            |            |            |           | Missing  | 11                 |              |         |                      |
|            |            | rs4802998  | 44079556  | AA       | 439                | 87.46        | 0.588   | 0.0009               |
|            |            |            |           | AG       | 568                | 87.79        |         |                      |
|            |            |            |           | GG       | 184                | 87.34        |         |                      |
|            |            |            |           | Missing  | 1                  |              |         |                      |
| rs10405150 | 44079759   | TT         | 1035      | 87.5     | 0.341              | 0.0018       |         |                      |
|            |            | TC         | 146       | 88.25    |                    |              |         |                      |
|            |            | CC         | 6         | 88.92    |                    |              |         |                      |
|            |            | Missing    | 5         |          |                    |              |         |                      |
| TP53       | 17p13.1    | rs1042522  | 7520197   | GG       | 384                | 87.70        | 0.175   | 0.003                |
|            |            |            |           | GC       | 434                | 87.36        |         |                      |
|            |            |            |           | CC       | 72                 | 88.79        |         |                      |
|            |            |            |           | Missing  | 2                  |              |         |                      |
| GPX1       | 3p21.31    | rs1800668  | 49370761  | CC       | 575                | 87.89        | 0.39    | 0.016                |
|            |            |            |           | CT       | 480                | 87.39        |         |                      |
|            |            |            |           | TT       | 106                | 87.50        |         |                      |
|            |            |            |           | Missing  | 31                 |              |         |                      |
| SOD2       | 6q25.3     | rs4880     | 160033862 | TT       | 308                | 87.94        | 0.154   | 0.0033               |
|            |            |            |           | TC       | 550                | 87.73        |         |                      |
|            |            |            |           | CC       | 300                | 87.03        |         |                      |
|            |            |            |           | Missing  | 34                 |              |         |                      |
|            |            | rs2755209  | 40035804  | AA       | 439                | 87.38        | 0.467   | 0.0013               |
|            |            |            |           | AC       | 551                | 87.63        |         |                      |
|            |            |            |           | CC       | 189                | 88.04        |         |                      |
|            |            |            |           | Missing  | 13                 |              |         |                      |
|            |            | rs2701858  | 40036389  | CC       | 1030               | 87.62        | 0.219   | 0.0026               |
|            |            |            |           | CT       | 148                | 87.60        |         |                      |
|            |            |            |           | TT       | 9                  | 84.03        |         |                      |
|            |            |            |           | Missing  | 5                  |              |         |                      |
|            |            | rs2721068  | 40037712  | TT       | 664                | 87.58        | 0.938   | 0.0001               |
|            |            |            |           | TC       | 447                | 87.65        |         |                      |
|            |            |            |           | CC       | 98                 | 87.82        |         |                      |
|            |            |            |           | Missing  | 3                  |              |         |                      |
| FOXO1      | 13q14.11   | rs17446614 | 40037877  | GG       | 860                | 87.62        | 0.084   | 0.0042               |
|            |            |            |           | GA       | 295                | 87.47        |         |                      |
|            |            |            |           | AA       | 36                 | 89.88        |         |                      |
|            |            |            |           | Missing  | 1                  |              |         |                      |

| Gene  | Chromosome | rs#        | Position  | Genotype | Genotype frequency | Age at death | q-value | Partial correlation* |
|-------|------------|------------|-----------|----------|--------------------|--------------|---------|----------------------|
| FOXO1 | 13q14.11   | rs7317254  | 40115849  | AA       | 554                | 87.52        | 0.669   | 0.0007               |
|       |            |            |           | AG       | 501                | 87.59        |         |                      |
|       |            |            |           | GG       | 122                | 88.07        |         |                      |
|       |            |            |           | Missing  | 15                 |              |         |                      |
|       |            | rs1334241  | 40121110  | GG       | 762                | 87.59        | 0.099   | 0.004                |
|       |            |            |           | GA       | 374                | 87.58        |         |                      |
|       |            |            |           | AA       | 54                 | 89.44        |         |                      |
|       |            |            |           | Missing  | 2                  |              |         |                      |
|       |            | rs2297627  | 40131931  | TT       | 548                | 87.53        | 0.559   | 0.001                |
|       |            |            |           | TC       | 485                | 87.56        |         |                      |
|       |            |            |           | CC       | 126                | 88.18        |         |                      |
|       |            |            |           | Missing  | 33                 |              |         |                      |
| CAMK4 | 5q22.1     | rs10491334 | 110800303 | CC       | 752                | 87.56        | 0.551   | 0.001                |
|       |            |            |           | CT       | 366                | 87.36        |         |                      |
|       |            |            |           | TT       | 54                 | 86.66        |         |                      |
|       |            |            |           | Missing  | 20                 |              |         |                      |
